# Supplementary material for: Cyclic boronates as versatile scaffolds for KPC-2 β-lactamase inhibition
Source: Royal Society of Chemistry journal article supplement (doi:10.1039/c9md00557a), 2020-01-01
Supplement: c9md00557a1.pdf [file c9md00557a1.pdf]

Supplemental information for

## **Cyclic boronates as versatile scaffolds for KPC-2 $\beta$ -lactamase inhibition**

*Catherine L. Tooke<sup>1</sup>, Philip Hinchliffe<sup>1</sup>, Alen Krajnc<sup>2</sup>, Adrian J. Mulholland<sup>3</sup>, Jürgen Brem<sup>2</sup>,  
Christopher J. Schofield<sup>2</sup>, James Spencer<sup>1,\*</sup>*

<sup>1</sup>School of Cellular and Molecular Medicine, Biomedical Sciences Building, University of Bristol, Bristol, BS8 1TD, United Kingdom

<sup>2</sup>Chemistry Research Laboratory, Department of Chemistry, 12 Mansfield Road, University of Oxford, Oxford, OX1 3TA, United Kingdom.

<sup>3</sup>Centre for Computational Chemistry, School of Chemistry, University of Bristol, Bristol, BS8 1TS, United Kingdom

\*Corresponding author: James Spencer; [jim.spencer@bristol.ac.uk](mailto:jim.spencer@bristol.ac.uk)

## Table of Contents

|                                                                                                                                |          |
|--------------------------------------------------------------------------------------------------------------------------------|----------|
| <b>Author Contributions .....</b>                                                                                              | <b>3</b> |
| <b>Supplementary Figures .....</b>                                                                                             | <b>4</b> |
| Figure S1. Kinetic characterisation of cyclic boronate inhibitors with KPC-2.....                                              | 4        |
| Figure S2. Conformations of the C-3 substituent of vaborbactam and taniborbactam in KPC-2...                                   | 5        |
| Figure S3. Interactions of vaborbactam and taniborbactam in KPC-2 .....                                                        | 6        |
| <b>Supplementary Tables .....</b>                                                                                              | <b>7</b> |
| Table S1. MICs of cefepime/meropenem against KPC-2 producing <i>K. pneumoniae</i> in the<br>presence of cyclic boronates ..... | 7        |
| Table S2. Data collection and refinement statistics. ....                                                                      | 8        |
| Table S3. Interaction distances (Å) of cyclic boronates in complex with KPC-2 .....                                            | 9        |

### **Author Contributions**

CLT purified the enzyme and collected kinetic, microbiological and crystallographic data; CLT and PH solved and refined the crystal structures; AK synthesized taniborbactam; all authors analysed the data; CLT, PH and JS wrote the manuscript; CLT, PH, AJM, JB, CJS and JS designed the research; all authors edited the manuscript.

## Supplementary Figures

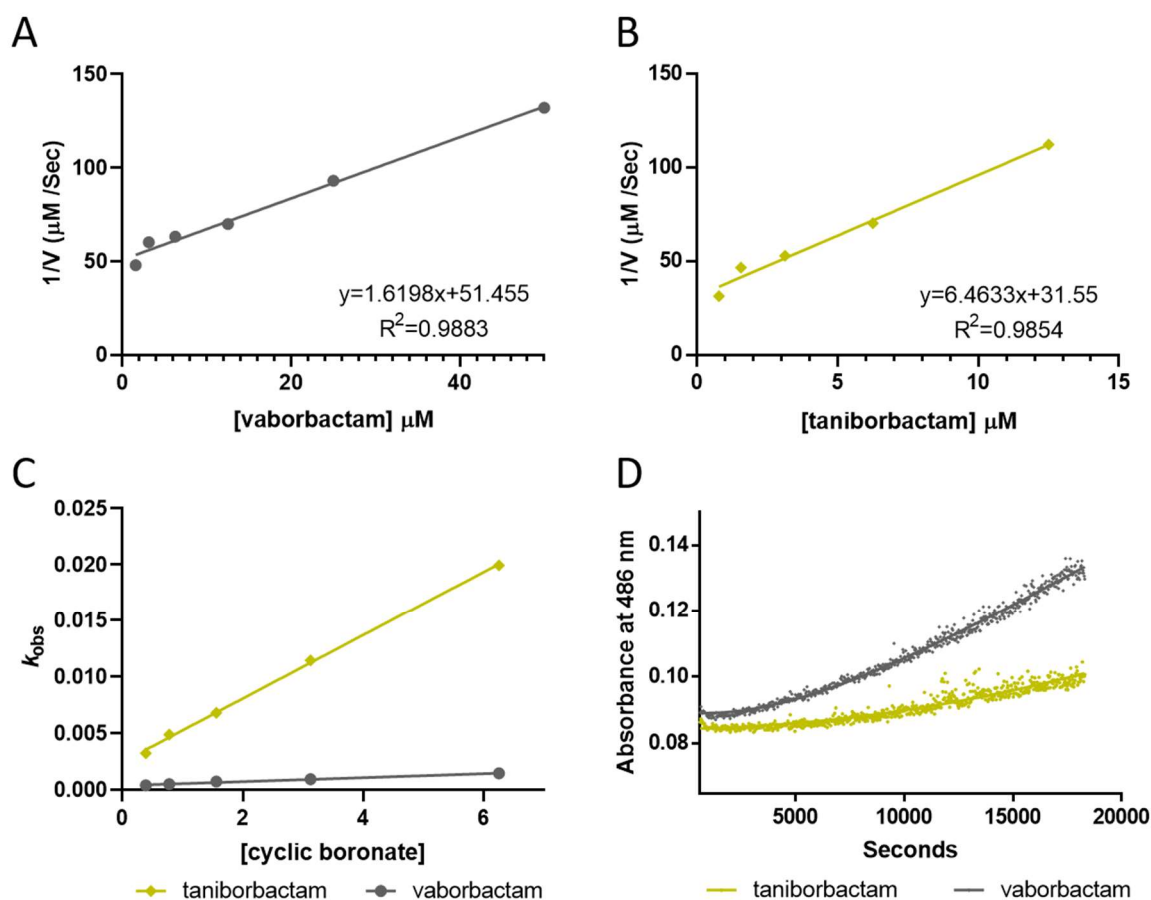

**Figure S1. Kinetic characterisation of cyclic boronate inhibitors with KPC-2.** (A and B) Dixon plots of reciprocals of initial nitrocefin hydrolysis rates ( $1/V$ ) by enzyme:cyclic boronate mixtures plotted against inhibitor (A, vaborbactam and B, taniborbactam) concentration. The apparent inhibition constant  $K_{iapp}$  is obtained from the slope of the fitted straight line. (C) Plots of  $k_{\text{obs}}$  (pseudo-first-order rate constant for inactivation) against inhibitor concentration. The apparent second-order rate constant  $k_2/K$  is obtained from the slope of the fitted straight line. (D) Progress curves representing recovery of nitrocefin hydrolysis following 30-minute preincubation of enzyme (1  $\mu\text{M}$ ) with 8  $\mu\text{M}$  cyclic boronate, followed by dilution to a final concentration of 500 pM enzyme. The rates of recovery of free enzyme,  $k_{\text{off}}$ , were obtained as described in Reference 32 of the main text. Data points shown are means of three replicates.

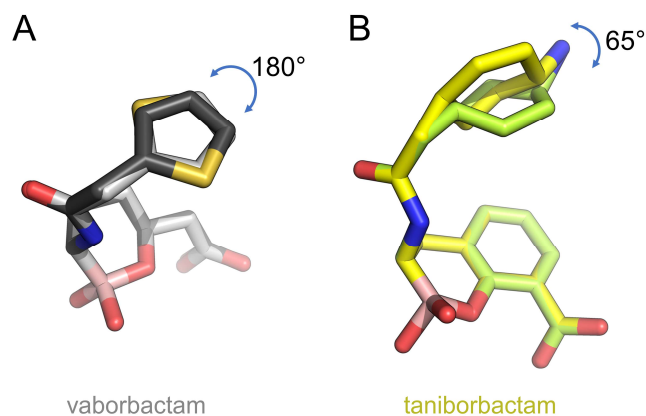

**Figure S2. Conformations of the C-3 substituent of vaborbactam and taniborbactam in KPC-2.** (A) Two conformers of vaborbactam modelled into KPC-2 with 0.62 (light grey) and 0.38 (dark grey) occupancy, showing a 180° rotation of the thiophene moiety of the C-3 substituent. (B) Two conformers of taniborbactam modelled into KPC-2 with 0.89 (yellow) and 0.11 (green) occupancy, showing a ~65° rotation of the cyclohexane ring of the C-3 substituent.

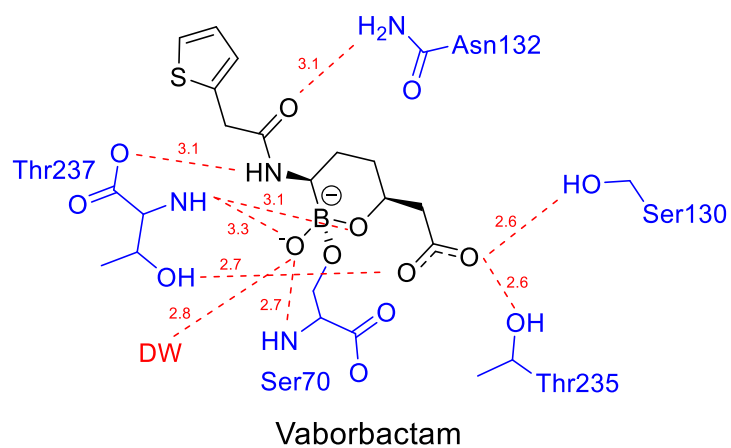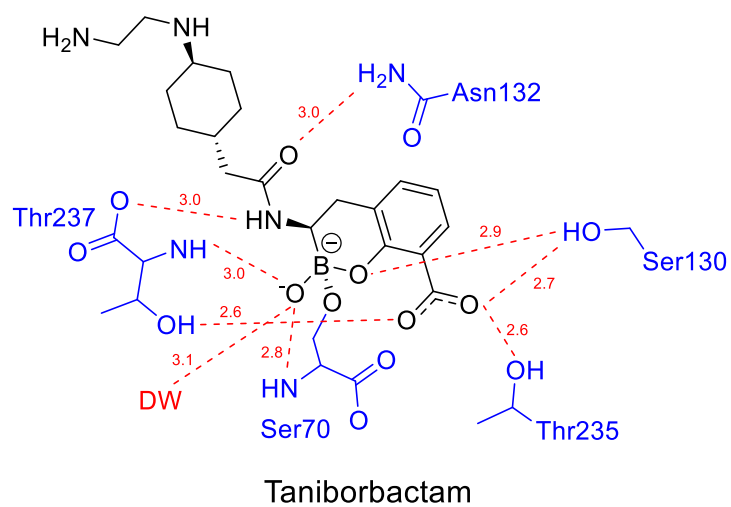

**Figure S3. Interactions of vaborbactam and taniborbactam in KPC-2.** Main chain protein residues are coloured blue, and the water in the deacylating position (DW) is in red. Interactions are shown as red dashes with corresponding distances in Å.

## Supplementary Tables

**Table S1. MICs of cefepime/meropenem against KPC-2 producing *K. pneumoniae* in the presence of cyclic boronates.**

| Strain | Plasmid     | MIC (ug/ml)  |              |              |              |              |              |
|--------|-------------|--------------|--------------|--------------|--------------|--------------|--------------|
|        |             | cefepime     |              |              | meropenem    |              |              |
|        |             | No inhibitor | +VAB (4mg/L) | +TAN (4mg/L) | No inhibitor | +VAB (4mg/L) | +TAN (4mg/L) |
| Ecl8   | pUBYT       | ≤0.125       | -            | -            | ≤0.125       | -            | -            |
| Ecl8   | pUBYT KPC-2 | ≥256         | ≤0.125       | ≤0.125       | 16           | ≤0.125       | ≤0.125       |

VAB: vaborbactam

TAN: taniborbactam

**Table S2. Data collection and refinement statistics.**

|                                     | <b>KPC-2:<br/>vaborbactam</b> | <b>KPC-2:<br/>VNRX-5133</b> |
|-------------------------------------|-------------------------------|-----------------------------|
| <b>PDB accession</b>                | 6TD0                          | 6TD1                        |
| <b>Data collection</b>              |                               |                             |
| Beamline                            | ESRF ID23-1                   | ALBA BL13-XALOC             |
| Space group                         | $P2_12_12$                    | $P2_12_12$                  |
| Molecules/ASU                       | 1                             | 1                           |
| Cell dimensions                     |                               |                             |
| $a, b, c$ (Å)                       | 59.92, 77.94, 55.73           | 60.56, 79.76, 56.02         |
| $\alpha, \beta, \gamma$ (°)         | 90.0, 90.0, 90.0              | 90.0, 90.0, 90.0            |
| Wavelength                          | 0.92                          | 0.90                        |
| Resolution (Å)                      | 45.33 – 0.99 (1.01 – 0.99)    | 45.84 – 1.20 (1.22 – 1.20)  |
| $R_{\text{pim}}$                    | 0.027 (0.444)                 | 0.030 (0.520)               |
| CC 1/2                              | 0.999 (0.552)                 | 0.999 (0.708)               |
| $I / \sigma I$                      | 12.2 (2.0)                    | 11.4 (1.1)                  |
| Completeness (%)                    | 99.3 (99.1)                   | 100.0 (100.0)               |
| Redundancy                          | 12.5 (12.3)                   | 13.0 (11.9)                 |
| <b>Refinement</b>                   |                               |                             |
| Resolution (Å)                      | 45.33 – 0.99                  | 41.12 – 1.20                |
| No. reflections                     | 144249                        | 85424                       |
| $R_{\text{work}} / R_{\text{free}}$ | 13.82 / 15.32                 | 13.60 / 15.21               |
| No. non-H atoms                     |                               |                             |
| Protein                             | 2121                          | 2195                        |
| Solvent                             | 331                           | 404                         |
| Inhibitor                           | 40 <sup>#</sup>               | 50 <sup>#</sup>             |
| $B$ -factors                        |                               |                             |
| Protein                             | 15.02                         | 17.19                       |
| Solvent                             | 28.72                         | 35.23                       |
| Inhibitor                           | 18.48                         | 17.00                       |
| R.m.s. deviations                   |                               |                             |
| Bond lengths (Å)                    | 0.012                         | 0.013                       |
| Bond angles (°)                     | 1.502                         | 1.425                       |
| Ramachandran (%)                    |                               |                             |
| Outliers                            | 0.0                           | 0.0                         |
| Favoured                            | 98.88                         | 98.88                       |

\*Values in parentheses are for highest-resolution shell.

<sup>#</sup>Inhibitor modelled as dual occupancy



**Table S3. Interaction distances (Å) of cyclic boronates in complex with KPC-2.**

| <b>Inhibitor group/atom</b> | <b>Protein residue/atom</b> | <b>vaborbactam</b> | <b>taniborbactam</b> | <b>difference</b> |
|-----------------------------|-----------------------------|--------------------|----------------------|-------------------|
| Acetamido O                 | Asn132, sidechain N         | 3.05               | 3.02                 | 0.03              |
| Carboxylate O1              | Ser130, sidechain O         | 2.64               | 2.72                 | 0.08              |
| Carboxylate O1              | Thr235, sidechain O         | 2.57               | 2.58                 | 0.01              |
| Carboxylate O2              | Thr237, sidechain O         | 2.65               | 2.60                 | 0.05              |
| Amide N                     | Thr237, backbone O          | 3.06               | 2.97                 | 0.09              |
| Boron-bound OH              | Thr237, backbone N          | 3.27               | 3.04                 | 0.23              |
| Boron-bound OH              | Ser70, backbone N           | 2.72               | 2.82                 | 0.10              |
| Endocyclic ester O          | Ser130, sidechain O         | -                  | 2.93                 | -                 |
| Endocyclic ester O          | Thr237, backbone N          | 3.06               | -                    | -                 |
| Boron-bound OH              | ‘deacylation’ water         | 2.75               | 3.10                 | 0.35              |
